# Supplementary material
Source: PubMed Central journal article supplement (PMC4332032)
Supplement: molcell-38-2-151-supple.pdf [file molcell-38-2-151-supple.pdf]

## Supplementary Data

### Galangin and Kaempferol Suppress Phorbol-12-myristate-13-acetate-induced Matrix Metalloproteinase-9 Expression in Human Fibrosarcoma HT-1080 Cells

Yu Jung Choi, Young Hun Lee, and Seung-Taek Lee\*

Department of Biochemistry, College of Life Science and Biotechnology, Yonsei University, Seoul 120-749, Republic of Korea

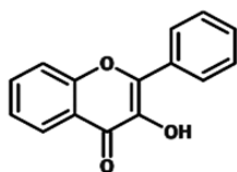

3-hydroxyflavone

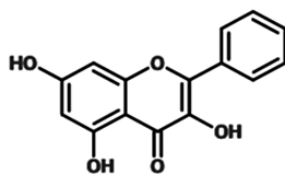

Galangin

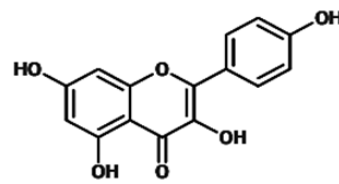

Kaempferol

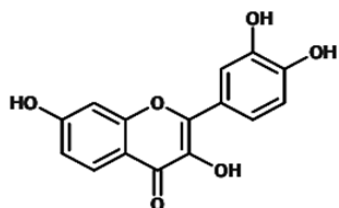

Fisetin

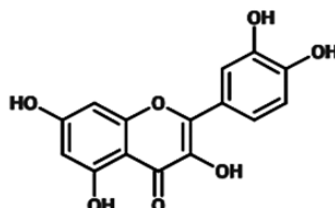

Quercetin

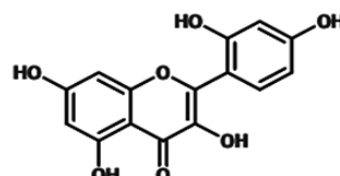

Morin

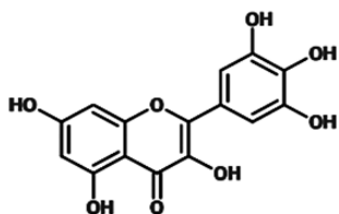

Myricetin

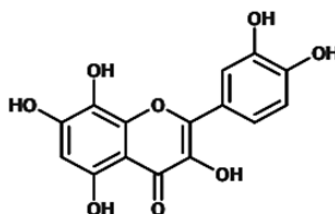

Gossypetin

Supplementary Figure 1. Chemical structure of the flavonols used in this study.
